# Supplementary material
Source: Research Square preprint supplement (doi:10.21203/rs.3.rs-9076008/v1)
Supplement: Supplementary file 1 [file fc08dbc3c02738a104bcb804.docx]

**Simulation results**

***Ex-ante* analysis**

*Simulation 1*: country O and P are better off

The psychological structure of managers is and .

With b = 0.51 and  = 0.45, we have , and . The sum of the compensated incomes are and. Therefore country O and country P are *ex-ante* better off with trade. Moreover, the world is better off since .

*Simulation 2*: country P is worse off

The psychological structure of managers is and .

With b = 0.51 and  = 0.45, we have , and . The compensated incomes are and . Therefore, country O is better off with trade whereas country P is worse off. Moreover, the world is better off since .

***Ex-post* analysis**

*Simulation 3*: country O or country P might be worse off.

The psychological structure of the managers in countries O and P are respectively:

and

For all simulated values of the parameters b and  the world is always better off ().

When the world is globally optimistic (), country P is always better off with trade. Country O can be either worse off or better off with trade depending on the parameter values.

– with b = 0.35 and  = 0.45, we have , , . The impact of free trade on *ex-post* welfare is and .

– with b = 0.43 and  = 0.001, we obtain , and . The impact of free trade on *ex-post* welfare is and .

When the world is globally pessimistic (), country O is always better off while country P can be either worse off or better off according to the parameter values:

– with b = 0.66 and  = 0.45, we have , and . The impact of free trade on *ex-post* welfare is and .

– with b = 0.51 and  = 0.45, we obtain , and . The impact of free trade on *ex-post* welfare is and .

*Simulation 4:* A globally pessimistic world might be worse off.

The psychological structure of the managers in countries O and P are respectively:

and

For some values of parameters, the world is globally pessimistic and is worse off with trade. With b = 0.66 and  = 0.45 we obtain , and . The impact of free trade on *ex-post* welfare is , and . Note that the aggregate number of entrepreneurs falls: .

*Simulation 5*: A globally optimistic world might be worse off.

The psychological structure of the managers in countries O and P are respectively:

and

For some values of parameters, the world is globally optimistic and is worse off with trade. With b = 0.2 and  = 0.45 we obtain , and . The impact of free trade on *ex-post* welfare is , and . The aggregate number of entrepreneurs rises: .

**Demand conditions and ex-post gains from trade**

Note: the distribution functions of distorted probabilities are and , with .

**The psychological distance between countries and the gains from trade**

Note: The *ex-ante* and *ex-post* gains from trade are given for both countries along the y-axis. *Zp* is an indicator of the psychological distance along the x-axis. The distribution functions are and with , and demand conditions are given by . When *Zp* is greater than 1, country O and country P export the commodity in which they enjoy comparative advantage.
